# Supplementary material for: Virus-Induced Autoimmune Diabetes in the LEW.1WR1 Rat Requires Iddm14 and a Genetic Locus Proximal to the Major Histocompatibility Complex
Source: Oxford University Press journal article supplement (doi:10.2337/db09-0387), 2009-08-31
Supplement: db090387-sup-supp_table_2_-_ubd_comparison.xls [file db090387-sup-supp_table_2_-_ubd_comparison.xls]

## Sheet: Sheet1
	Online Supplemental Table 2.
	Comparison of UBD genotypes among species
	Amino Acids -->				1	2	3	4	5	6	7	8	9	10	11	12	13	14	15	16	17	18	19	20	21	22	23	24	25	26	27	28	29	30	31	32	33	34	35	36	37	38	39	40	41	42	43	44	45
RefSeq	Species
Q921A3:	Rattus norvegicus				M	A	S		C	V	C	V	V	R	S	E	Q	W	P	L	M	T	F	D	T	T	M	S	D	K	V	K	K	I	N	E	H	I	R	S	Q	T	K	V	S	V	Q	D	Q
EDL84635	Rattus norvegicus				M	A	S		C	V	C	V	V	H	S	E	Q	W	P	L	M	T	F	D	T	T	M	S	D	K	V	K	K	I	N	E	H	I	R	S	Q	T	K	V	S	V	Q	D	Q
LEW.1WR1	Rattus norvegicus				M	A	S		C	V	C	V	V	R	S	E	Q	W	P	L	M	T	F	D	T	T	M	S	D	K	V	K	K	I	N	E	H	I	R	S	Q	T	K	V	S	V	Q	D	Q
LEW.1W/LEW	Rattus norvegicus				M	A	S		C	V	C	V	V	H	S	E	Q	W	P	L	M	T	F	D	T	T	M	S	D	K	V	K	K	I	N	E	H	I	R	S	Q	T	K	V	S	V	Q	D	Q
P63072	Mus musculus				M	A	S		R	T	C	V	V	R	S	D	Q	W	R	L	M	T	F	E	T	T	E	N	D	K	V	K	K	I	N	E	H	I	R	S	Q	T	K	V	S	V	Q	D	Q
XP_0011027	Macaca mulatta	M	A	P	N	A	S	C	L	S	V	H	V	L	S	E	E	W	D	L	M	T	F	D	A	N	P	E	D	S	V	K	K	I	N	E	H	V	R	S	K	T	K	V	P	V	Q	D	Q
	Homo sapiens HLA supertype 8.1	M	A	P	N	A	S	C	L	C	V	H	V	R	S	E	E	W	D	L	M	T	F	D	A	N	P	Y	D	S	V	K	K	I	K	E	H	V	R	S	K	T	K	V	P	V	Q	D	Q
CAA21458	Homo sapiens	M	A	P	N	A	S	C	L	C	V	H	V	R	S	E	E	W	D	L	M	T	F	D	A	N	P	Y	D	S	V	K	K	I	K	E	H	V	R	S	K	T	K	V	P	V	Q	D	Q
XP_0014905	Equus caballus				L	T	F	V	V	Q	V	N	V	H	S	E	Q	W	K	L	M	T	F	N	A	N	S	Y	D	R	V	K	K	I	N	E	H	V	R	S	K	T	K	V	P	V	Q	D	Q
XP_527322	Pan troglodytes	M	A	P	N	A	S	C	L	C	V	H	V	R	S	E	E	W	D	L	M	T	F	D	A	N	P	D	D	S	V	K	K	I	K	E	H	V	R	S	K	T	K	V	P	V	Q	D	Q
BAD83374	Sus scrofa				M	A	A	G	V	C	V	M	V	S	S	H	Q	W	E	S	M	T	F	M	A	Y	L	E	D	R	V	K	K	I	N	E	H	I	R	S	K	T	K	V	P	V	P	D	Q
AAI02439	Bos taurus				M	A	T	V	V	D	V	T	V	H	S	E	K	W	K	P	M	T	F	P	A	H	L	G	D	R	V	N	K	I	K	E	R	V	R	S	R	T	K	V	P	V	P	D	Q
AAM51224	Bigelowiella natans				x	x	M	S	M	Q	I	F	V	K	T	L	T	G	K	T	I	T	L	D	V	D	S	S	D	T	I	N	T	V	K	Q	K	I	Q	D	K	E	G	I	P	P	D	Q	Q
ECJ41981	marine metagenome				L	S	S	S	M	Q	I	F	V	K	T	L	T	G	K	T	I	T	L	D	V	E	A	S	D	T	I	E	N	V	K	Q	K	I	Q	D	K	E	G	I	P	P	D	Q	Q
CAA39250	Phytophthora infestans								M	Q	I	F	V	K	T	L	T	G	K	T	I	T	L	D	V	E	P	S	D	S	I	D	N	V	K	Q	K	I	Q	D	K	E	G	I	P	P	D	Q	Q
XP_751791	Aspergillus fumigatus Af293								M	Q	I	F	V	K	T	L	T	G	K	T	I	T	L	E	V	E	S	S	D	T	I	E	N	V	K	Q	K	I	Q	D	K	E	G	I	P	P	D	Q	Q
CAA11269	Nicotiana tabacum								M	Q	I	F	V	K	T	L	T	G	K	T	I	T	L	E	V	E	S	S	D	T	I	E	N	V	K	Q	K	I	Q	D	K	E	G	I	P	P	D	Q	Q
CAA82268	Acetabularia peniculus				L	R	G	G	M	Q	I	F	V	K	T	L	T	G	K	T	I	T	L	E	V	Q	S	S	D	T	V	E	N	V	K	S	K	I	Q	D	K	E	G	I	P	P	D	Q	Q
AAM51199	Lotharella amoeboformis																			T	I	T	L	D	V	D	S	S	D	T	I	N	T	V	K	Q	K	I	Q	D	K	E	G	I	P	P	D	Q	Q
AAM51220	Euglypha rotunda								M	Q	I	F	V	x	x	x	x	x	x	T	I	T	L	D	V	E	A	S	D	T	I	E	N	V	K	Q	K	I	Q	D	K	E	G	I	P	P	D	Q	Q
XP_0010184	Tetrahymena thermophila SB210								L	T	G	x	K	K	T	L	T	G	K	T	I	T	L	D	V	E	A	S	D	T	I	E	N	V	K	A	K	I	Q	D	K	E	G	I	P	P	D	Q	Q
BAE48510	Raphidiophrys contractilis								M	Q	I	F	V	x	x	x	x	x	x	T	I	T	L	E	V	E	S	S	D	S	I	E	N	V	K	A	K	I	Q	D	K	E	G	I	P	P	D	Q	Q
CAE00783	Sordaria macrospora																		x	x	x	x	L	T	G	x	K	S	D	T	I	D	N	V	K	Q	K	I	Q	D	K	E	D	I	P	P	D	Q	Q
XP_0019470	Acyrthosiphon pisum						I	T	L	E	V	E	S	K	T	L	T	G	K	T	I	T	L	E	V	E	S	S	D	S	I	E	N	V	K	A	K	I	Q	D	K	E	G	I	P	P	D	Q	Q
CAA31530	Neurospora crassa								M	Q	I	F	V	K	T	L	T	G	K	T	I	T	L	E	V	E	S	S	D	T	I	D	N	V	K	Q	K	I	Q	D	K	E	G	I	P	P	D	Q	Q
EDL46864	Plasmodium vivax								M	Q	I	F	V	K	T	L	T	G	K	T	I	T	L	D	V	E	S	S	D	T	I	E	N	V	K	S	K	I	Q	D	K	E	G	I	P	P	D	Q	Q
XP_0017441	Monosiga brevicollis MX1								M	Q	I	F	V	K	T	L	T	G	K	T	I	T	L	E	V	E	P	S	D	S	I	E	N	V	K	A	K	I	Q	D	K	E	G	I	P	P	D	Q	Q
XP_0020352	Drosophila sechellia								M	Q	I	F	V	K	T	L	T	G	K	T	I	T	L	E	V	E	P	S	D	T	I	E	N	V	K	A	K	I	Q	D	K	E	G	I	P	P	D	Q	Q
EEB18688	Pediculus humanus corporis								M	Q	I	F	V	K	T	L	T	G	K	T	I	T	L	E	V	E	A	S	D	T	I	E	N	V	K	A	K	I	Q	D	K	E	G	I	P	P	D	Q	Q
AAA62225	Euplotes eurystomus								L	T	G	x	K	K	T	L	T	G	K	T	I	T	L	E	V	E	A	S	D	T	I	E	N	V	K	A	K	I	Q	D	K	E	G	I	P	A	D	Q	Q
CAQ42596	Plasmodium knowlesi strain H								M	Q	I	F	V	K	T	L	T	G	K	T	I	T	L	D	V	E	S	S	D	T	I	E	N	V	K	A	K	I	Q	D	K	E	G	I	P	P	D	Q	Q
ACH45565	Taeniopygia guttata								M	Q	I	F	V	K	T	L	T	G	K	T	I	T	L	E	V	E	P	S	D	T	I	E	N	V	K	A	K	I	Q	D	K	E	G	I	P	P	D	Q	Q
AAM22069	Caenorhabditis elegans								M	Q	I	F	V	K	T	L	T	G	K	T	I	T	L	E	V	E	A	S	D	T	I	E	N	V	K	A	K	I	Q	D	K	E	G	I	P	P	D	Q	Q
CAA50268	Geodia cydonium								M	Q	I	F	V	K	T	L	T	G	K	T	I	T	L	E	V	E	A	S	D	T	I	E	N	V	K	A	K	I	Q	D	K	E	G	I	P	P	D	Q	Q
gi|445141	Aglaothamnion neglectum								M	Q	I	F	V	K	T	L	T	G	K	T	I	T	L	E	V	E	S	S	D	T	I	E	N	V	K	T	K	I	Q	D	K	E	G	I	P	P	D	Q	Q
ACF06493	Elaeis guineensis								M	Q	I	F	V	K	T	L	T	G	K	T	I	T	L	E	V	E	S	S	D	T	I	D	N	V	K	A	K	I	Q	D	K	E	G	I	P	P	D	Q	Q
XP_0021193	Ciona intestinalis								M	Q	I	F	V	K	T	L	T	G	K	T	I	T	L	E	V	E	A	S	D	S	I	D	N	V	K	A	K	I	Q	D	K	E	G	I	P	P	D	Q	Q
CAA52290	Volvox carteri f. nagariensis								M	Q	I	F	V	K	T	L	T	G	K	T	I	T	L	E	V	E	S	S	D	T	I	E	N	V	K	A	K	I	Q	D	K	E	G	I	P	P	D	Q	Q
BAB63445	Physarum polycephalum								M	Q	I	F	V	K	T	L	T	G	K	T	I	T	L	E	V	E	S	S	D	T	I	E	S	V	K	T	K	I	Q	D	K	E	G	I	P	P	D	Q	Q
AAL91103	Acanthocheilonema viteae								M	Q	I	F	V	K	T	L	T	G	K	T	I	T	L	E	V	E	P	S	D	T	I	E	N	V	K	A	K	I	Q	D	K	E	G	I	P	P	D	Q	Q
AAL91109	Onchocerca volvulus								M	Q	I	F	V	K	T	L	T	G	K	T	I	T	L	E	V	E	A	S	D	T	I	E	N	V	K	A	K	I	Q	D	K	E	G	I	P	P	D	Q	Q
AAB87694	Amoeba proteus								M	Q	I	F	V	K	T	L	T	G	K	T	I	T	L	E	V	E	P	G	D	S	I	D	N	V	K	Q	K	I	Q	D	K	E	G	I	P	P	D	Q	Q
AAK68824	Arabidopsis thaliana								M	Q	I	F	V	K	T	L	T	G	K	T	I	T	L	E	V	E	S	S	D	T	I	D	N	V	K	A	K	I	Q	D	K	E	G	I	P	P	D	Q	Q
gi|1095488	Gracilaria gracilis								M	Q	I	F	V	K	T	L	T	G	K	T	I	T	L	E	V	E	S	S	D	T	I	E	N	V	K	T	K	I	Q	D	K	E	G	I	P	P	D	Q	Q
AAF00920	Sterkiella histriomuscorum								M	Q	I	F	V	K	T	L	T	G	K	T	I	T	L	D	V	E	P	S	D	T	I	E	N	V	K	A	K	I	Q	D	K	E	G	I	P	P	D	Q	Q
AAN36206	Plasmodium falciparum 3D7								M	Q	I	F	V	K	T	L	T	G	K	T	I	T	L	D	V	E	P	S	D	T	I	E	N	V	K	A	K	I	Q	D	K	E	G	I	P	P	D	Q	Q
CAB90826	Cyanidium caldarium								M	Q	I	F	V	K	T	L	T	G	K	T	I	T	L	E	V	E	P	S	D	T	I	E	N	V	K	S	K	I	Q	D	K	E	G	I	P	P	D	Q	Q
EAA15770	Plasmodium yoelii yoelii								M	Q	I	F	V	K	T	L	T	G	K	T	I	T	L	E	V	E	A	S	D	T	I	E	N	V	K	A	K	I	Q	D	K	E	G	I	P	P	D	Q	Q
CAI59819	Nyctotherus ovalis								M	Q	I	F	V	K	T	L	T	G	K	T	I	T	L	E	V	E	A	S	D	T	I	E	N	V	K	A	K	I	Q	D	K	E	G	I	P	P	D	Q	Q
AAX56917	Gracilaria lemaneiformis								M	Q	I	F	V	K	T	L	T	G	K	T	I	T	L	E	V	E	S	S	D	T	I	E	N	V	K	T	K	I	Q	D	K	E	G	I	P	P	D	Q	Q
XP_393173	Apis mellifera								M	Q	I	F	V	K	T	L	T	G	K	T	I	T	L	E	V	E	A	S	D	T	I	E	N	V	K	A	K	I	Q	D	K	E	G	I	P	P	D	Q	Q
AAZ42330	Caenorhabditis remanei								M	Q	I	F	V	K	T	L	T	G	K	T	I	T	L	E	V	E	A	S	D	T	I	E	N	V	K	A	K	I	Q	D	K	E	G	I	P	P	D	Q	Q
EDN10288	Ajellomyces capsulatus NAm1								M	Q	I	F	V	K	T	L	T	G	K	T	I	T	L	D	V	E	S	A	D	T	I	D	A	V	K	S	K	I	Q	D	K	E	G	I	P	P	D	Q	Q
XP_0015994	Nasonia vitripennis								M	Q	I	F	V	K	T	L	T	G	K	T	I	T	L	E	V	E	A	S	D	T	I	E	N	V	K	A	K	I	Q	D	K	E	G	I	P	P	D	Q	Q
EDO97495	Chlamydomonas reinhardtii								M	Q	I	F	V	K	T	L	T	G	K	T	I	T	L	E	V	E	S	S	D	T	I	E	N	V	K	A	K	I	Q	D	K	E	G	I	P	P	D	Q	Q
CAJ41447	Paralvinella grasslei								M	Q	I	F	V	K	T	L	T	G	K	T	I	T	L	E	V	E	A	S	D	T	I	D	N	V	K	A	K	I	Q	D	K	E	G	I	P	P	D	Q	Q
EDV19200	Trichoplax adhaerens								M	Q	I	F	V	K	T	L	T	G	K	T	I	T	L	E	V	E	P	S	D	T	I	E	N	V	K	S	K	I	Q	D	K	E	G	I	P	P	D	Q	Q
XP_0020658	Drosophila willistoni								M	Q	I	F	V	K	T	L	T	G	K	T	I	T	L	E	V	E	A	S	D	T	I	E	N	V	K	A	K	I	Q	D	K	E	G	I	P	P	D	Q	Q
EEB03594	Toxoplasma gondii ME49								M	Q	I	F	V	K	T	L	T	G	K	T	I	T	L	D	V	E	P	S	D	T	I	E	N	V	K	A	K	I	Q	D	K	E	G	I	P	P	D	Q	Q
XP_453980	Kluyveromyces lactis NRRL Y-1140								M	Q	I	F	V	K	T	L	T	G	K	T	I	T	L	E	V	E	S	S	D	T	I	D	N	V	K	S	K	I	Q	D	K	E	G	I	P	P	D	Q	Q
CAA29198	Saccharomyces cerevisiae								M	Q	I	F	V	K	T	L	T	G	K	T	I	T	L	E	V	E	S	S	D	T	I	D	N	V	K	S	K	I	Q	D	K	E	G	I	P	P	D	Q	Q
AAC64787	Schizosaccharomyces pombe								M	Q	I	F	V	K	T	L	T	G	K	T	I	T	L	E	V	E	S	S	D	T	I	D	N	V	K	S	K	I	Q	D	K	E	G	I	P	P	D	Q	Q
AAK19308	Tuber borchii								M	Q	I	F	V	K	T	L	T	G	K	T	I	T	L	E	V	E	S	S	D	T	I	D	N	V	K	S	K	I	Q	D	K	E	G	I	P	P	D	Q	Q
XP_719867	Candida albicans SC5314								M	Q	I	F	V	K	T	L	T	G	K	T	I	T	L	E	V	E	S	S	D	T	I	D	N	V	K	S	K	I	Q	D	K	E	G	I	P	P	D	Q	Q
AAC13691	Magnaporthe grisea								M	Q	I	F	V	K	T	L	T	G	K	T	I	T	L	E	V	E	S	S	D	T	I	D	N	V	K	S	K	I	Q	D	K	E	G	I	P	P	D	Q	Q
CAA66667	Pinus sylvestris								M	Q	I	F	V	K	T	L	T	G	K	T	I	T	L	E	V	E	S	S	D	T	I	D	N	V	K	A	K	I	Q	D	K	E	G	I	P	P	D	Q	Q
AAA84868	Candida albicans								M	Q	I	F	V	K	T	L	T	G	K	T	I	T	L	E	V	E	S	S	D	T	I	D	N	V	K	S	K	I	Q	D	K	E	G	I	P	P	D	Q	Q
CAA07773	Gibberella pulicaris								M	Q	I	F	V	K	T	L	T	G	K	T	I	T	L	E	V	E	S	S	D	T	I	D	N	V	K	S	K	I	Q	D	K	E	G	I	P	P	D	Q	Q
AAQ07453	Musa acuminata								M	Q	I	F	V	K	T	L	T	G	K	T	I	T	L	E	V	E	S	S	D	T	I	D	N	V	K	A	K	I	Q	D	K	E	G	I	P	P	D	Q	Q
EDU40929	Pyrenophora tritici-repentis Pt-1C-BFP								M	Q	I	F	V	K	T	L	T	G	K	T	I	T	L	E	V	E	S	S	D	T	I	D	N	V	K	S	K	I	Q	D	K	E	G	I	P	P	D	Q	Q
NP_983342	Ashbya gossypii ATCC 10895								M	Q	I	F	V	K	T	L	T	G	K	T	I	T	L	E	V	E	S	S	D	T	I	D	N	V	K	S	K	I	Q	D	K	E	G	I	P	P	D	Q	Q
XP_445631	Candida glabrata CBS 138								M	Q	I	F	V	K	T	L	T	G	K	T	I	T	L	E	V	E	S	S	D	T	I	D	N	V	K	S	K	I	Q	D	K	E	G	I	P	P	D	Q	Q
CAG88798	Debaryomyces hansenii								M	Q	I	F	V	K	T	L	T	G	K	T	I	T	L	E	V	E	S	S	D	T	I	D	N	V	K	S	K	I	Q	D	K	E	G	I	P	P	D	Q	Q
AAV65292	Aspergillus fumigatus								M	Q	I	F	V	K	T	L	T	G	K	T	I	T	L	E	V	E	S	S	D	T	I	D	N	V	K	S	K	I	Q	D	K	E	G	I	P	P	D	Q	Q
XP_0018202	Aspergillus oryzae RIB40								M	Q	I	F	V	K	T	L	T	G	K	T	I	T	L	E	V	E	S	S	D	T	I	D	N	V	K	S	K	I	Q	D	K	E	G	I	P	P	D	Q	Q
ABC94632	Ictalurus punctatus								M	Q	I	F	V	K	T	L	T	G	K	T	I	T	L	E	V	E	P	S	D	T	I	E	N	V	K	A	K	I	Q	D	K	E	G	I	P	P	D	Q	Q
XP_0017970	Phaeosphaeria nodorum SN15								M	Q	I	F	V	K	T	L	T	G	K	T	I	T	L	E	V	E	S	S	D	T	I	D	N	V	K	S	K	I	Q	D	K	E	G	I	P	P	D	Q	Q
ABI53722	Porphyra yezoensis								M	Q	I	F	V	K	T	L	T	G	K	T	I	T	L	E	V	E	S	S	D	T	I	D	N	V	K	S	K	I	Q	D	K	E	G	I	P	P	D	Q	Q
EAW25084	Neosartorya fischeri NRRL 181								M	Q	I	F	V	K	T	L	T	G	K	T	I	T	L	E	V	E	S	S	D	T	I	D	N	V	K	S	K	I	Q	D	K	E	G	I	P	P	D	Q	Q
gi|1243778	Saccharomyces paradoxus NRRL Y-17217								M	Q	I	F	V	K	T	L	T	G	K	T	I	T	L	E	V	E	S	S	D	T	I	D	N	V	K	S	K	I	Q	D	K	E	G	I	P	P	D	Q	Q
XP_0014865	Pichia guilliermondii ATCC 6260								M	Q	I	F	V	K	T	L	T	G	K	T	I	T	L	E	V	E	S	S	D	T	I	D	N	V	K	S	K	I	Q	D	K	E	G	I	P	P	D	Q	Q
XP_0016439	Vanderwaltozyma polyspora DSM 70294								M	Q	I	F	V	K	T	L	T	G	K	T	I	T	L	E	V	E	S	S	D	T	I	D	N	V	K	S	K	I	Q	D	K	E	G	I	P	P	D	Q	Q
ABV22260	Karlodinium micrum								M	Q	I	F	V	K	T	L	T	G	K	T	I	T	L	D	V	E	A	S	D	T	I	D	N	V	K	A	K	I	Q	D	K	E	G	I	P	P	D	Q	Q
ABV22331	Noctiluca scintillans								M	Q	I	F	V	K	T	L	T	G	K	T	I	T	L	D	V	E	A	S	D	T	I	D	N	V	K	A	K	I	Q	D	K	E	G	I	P	P	D	Q	Q
EEB05438	Schizosaccharomyces japonicus yFS275								M	Q	I	F	V	K	T	L	T	G	K	T	I	T	L	E	V	E	S	S	D	T	I	D	N	V	K	S	K	I	Q	D	K	E	G	I	P	P	D	Q	Q
AAA33268	Dictyostelium discoideum								M	Q	I	F	V	K	T	L	T	G	K	T	I	T	L	E	V	E	G	S	D	N	I	E	N	V	K	A	K	I	Q	D	K	E	G	I	P	P	D	Q	Q
	common								69	70	69	69	81	70	70	70	70	70	72	73	73	85	74	60	73	70	43	76	86	67	73	34	70	74	78	26	74	80	74	74	80	74	73	74	81	73	74	74	86
	total								84	84	84	84	84	84	84	84	84	84	85	86	86	86	86	86	86	86	86	86	86	86	86	86	86	86	86	86	86	86	86	86	86	86	86	86	86	86	86	86	86
	% conserved								0.821429	0.833333	0.821429	0.821429	0.964286	0.833333	0.833333	0.833333	0.833333	0.833333	0.847059	0.848837	0.848837	0.988372	0.860465	0.697674	0.848837	0.813953	0.5	0.883721	1	0.77907	0.848837	0.395349	0.813953	0.860465	0.906977	0.302326	0.860465	0.930233	0.860465	0.860465	0.930233	0.860465	0.848837	0.860465	0.94186	0.848837	0.860465	0.860465	1
	consensus
																																																	Ubq - E2 interaction site
	Key
	amino acids in direct ubiquitin repeat
	Unusual amino acid in LEW.1WR1
	lower species have direct repeat ("rpt")
	>90% conserved over all
	>80% conserved (largely lower species)
	>90% mammalian conserved
	Legend to Online Table 2.
	A cross-species/phylum comparison of diubiquitin genes reveals extensive conservation of amino acids. A direct repeat is better conserved in lower organisms; all genes have the di-glycine repeat at the C terminus.
[truncated: 118 more columns]
